# Supplementary material for: Targeting Aryl Hydrocarbon Receptor Signaling Enhances Type I Interferon-Independent Resistance to Herpes Simplex Virus
Source: PubMed Central journal article supplement (PMC8528105; doi:10.1128/spectrum.00473-21), 2021-10-20
Supplement: spectrum.00473-21-s0001.pdf [file spectrum.00473-21-s0001.pdf]

**Fig. S1**

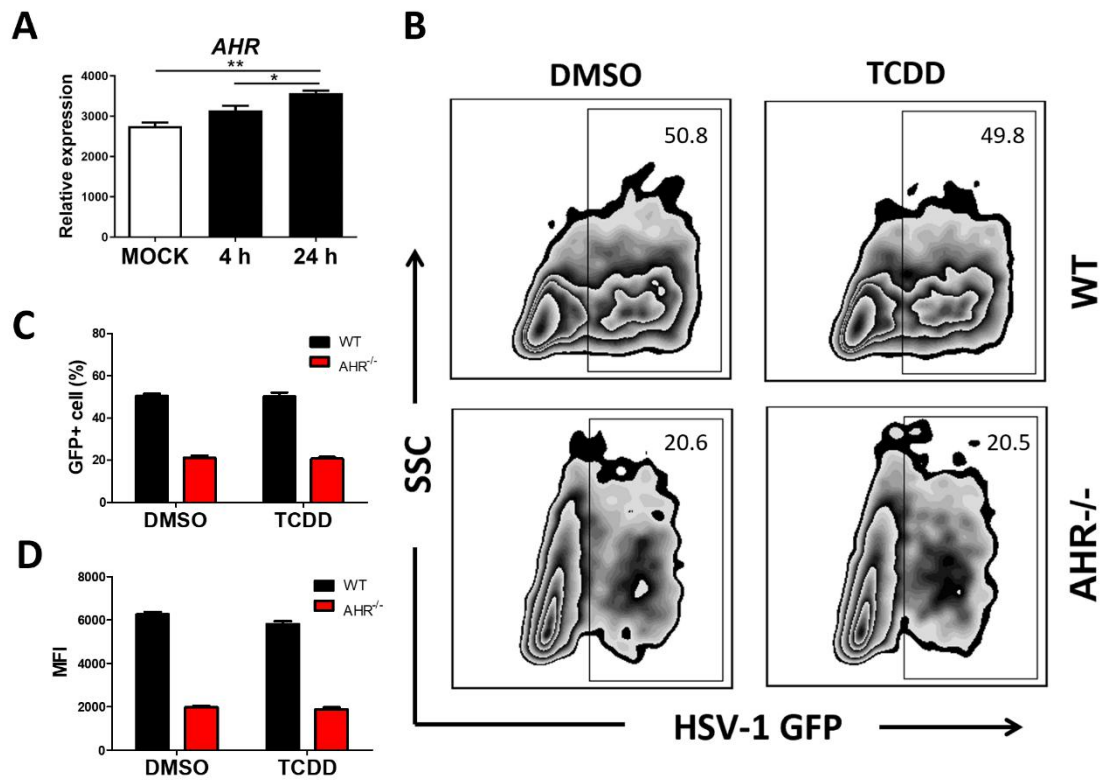

**Fig. S1. AHR ligand TCDD couldn't promote HSV-1 infection.**

WT and *AHR*<sup>-/-</sup> THP-1 cells were pretreated with AHR ligand TCDD or DMSO (as negative control) and then infected with HSV-1 GFP for 24h. The mRNA expression level of AHR in THP-1 cells infected with HSV-1 at indicated time point (A), Flowcytometry was used to show the proportion of auto-fluorescent GFP (B), corresponding statistic percentage of GFP positive cell (C) and mean fluorescence intensity (MFI) of GFP (D).

**Fig. S2**

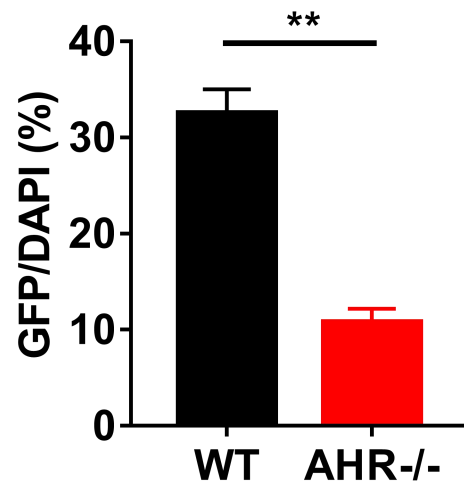

**Fig S2. Quantification of HSV-1 GFP+ cells using confocal microscopy.** WT and *AHR*<sup>-/-</sup> THP-1 cells were infected with GFP-expressing HSV-1 virus. The percentage of GFP positive cells was quantified by confocal microscopy at 24h.

Fig. S3

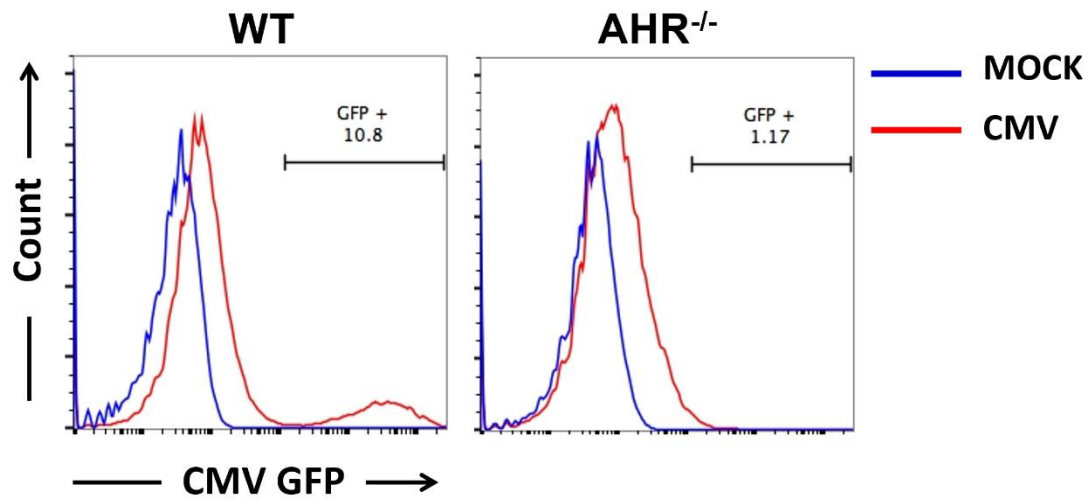

Fig. S3. *AHR*<sup>-/-</sup> THP-1 cells resist against CMV infection. WT and *AHR*<sup>-/-</sup> THP-1 cells were infected by cytomegalovirus (CMV) tagged with GFP for 24h and CMV-GFP intensity were determined by Flow cytometry.

**Fig. S4**

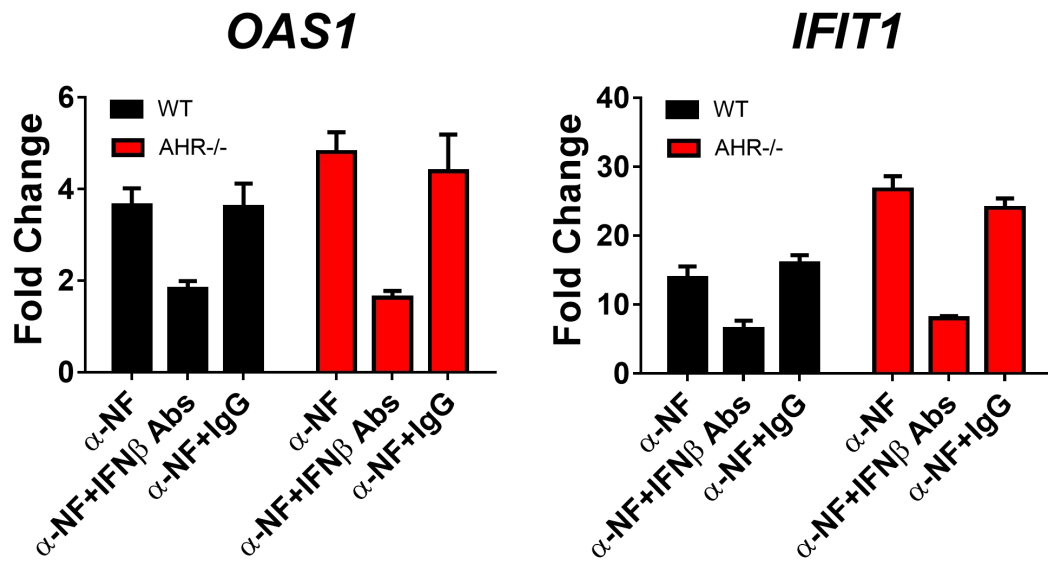

**Fig S4. ISGs expression after neutralizing IFN- $\beta$  at 6h post-infection.** WT and AHR-/- THP-1 cells were pretreated with  $\alpha$ -NF for 24h and IFN- $\beta$  antibody or isotype antibody were added at the same time as HSV-1 infection. The mRNA expression of IFN-inducible genes IFIT1 and OAS1 was measured by qPCR at 6h after HSV-1 infection.

**Table S1. qRT-PCR primer sequences**

| <b>primers</b>   | <b>sequences</b>          |
|------------------|---------------------------|
| AHR- gRNA-F      | CACCGAAGTCGGTCTCTATGCCGCT |
| AHR- gRNA-R      | AAACAGCGGCATAGAGACCGACTT  |
| hCYP1B1- F       | ACGTACCGGCCACTATCACT      |
| hCYP1B1- R       | CTCCCCACGACCTGATCCA       |
| hAHR-F           | ACATCACCTACGCCAGTCG       |
| hAHR-R           | CGCTTGGAAGGATTTGACTTGA    |
| hARNT-F          | CTGCCAACCCCGAAATGACAT     |
| hARNT-R          | CGCCGCTTAATAGCCCTCTG      |
| hIFN- $\beta$ -F | GTCACTGTGCCTGGACCATAG     |
| hIFN- $\beta$ -R | GTTTCGGAGGTAACCTGTAAGTC   |
| hOAS1-F          | TGTCCAAGGTGGTAAAGGGTG     |
| hOAS1-R          | CCGGCGATTTAACTGATCCTG     |
| hIFIT1- F        | GCGCTGGGTATGCGATCTC       |
| hIFIT1- R        | CAGCCTGCCTTAGGGGAAG       |
| hGAPDH-F         | GCACCGTCAAGGCTGAGAAC      |
| hGAPDH-R         | TGGTGAAGACGCCAGTGGA       |
